# Supplementary material for: Online Artificial Intelligence Chatbot Aptitude in Detection of Referable Diabetic Retinopathy
Source: Research Square preprint supplement (doi:10.21203/rs.3.rs-4530651/v1), 2024-08-23
Supplement: Supplementary file 1 [file 755674dcb7c339d7dc548a9a.docx]

**Supplementary Table 1.** Results from three retina specialist’s interpretation of images after being presented each image individually. Readable images are stratified by the determination of presence or absence of more than mild diabetic retinopathy (mtmDR) and vision-threatening diabetic retinopathy (VTDR). The consensus agreement was multiplied by three for ease of comparison to Table 1 and Supplementary Table 2’s results.

|  | | **Retina Specialists**  (consensus responses) | | | | |
| --- | --- | --- | --- | --- | --- | --- |
| Unreadable  n=24 | Readable  n=156 | | | |
| mtmDR,  non-VTDR | non-mtmDR, VTDR | mtmDR, VTDR | non-mtmDR, non-VTDR |
| **Predefined Image Database Categories** | normal | 0 (0.0%) | 30  (100.0%) | 0 (0.0%) | 0 (0.0%) | 0 (0.0%) |
| DR1 (mild NPDR) | 0 (0.0%) | 30  (100.0%) | 0 (0.0%) | 0 (0.0%) | 0 (0.0%) |
| DR2 (moderate NPDR) | 0 (0.0%) | 0 (0.0%) | 6  (20.0%) | 0 (0.0%) | 24  (80.0%) |
| DR3 (severe NPDR or PDR) | 0 (0.0%) | 0 (0.0%) | 0 (0.0%) | 0 (0.0%) | 30  (100.0%) |
| blur fundus without PDR | 24  (80.0%) | 0 (0.0%) | 0 (0.0%) | 0 (0.0%) | 6  (20.0%) |
| blur fundus with suspected PDR | 0 (0.0%) | 0 (0.0%) | 0 (0.0%) | 0 (0.0%) | 30  (100.0%) |
